# Supplementary material for: CBFA2T3-GLIS2 oncogenic fusion is sufficient for leukemic transformation
Source: Research Square preprint supplement (doi:10.21203/rs.3.rs-757279/v1), 2021-08-12
Supplement: Supplementary file 1 [file 2e7bbcfe857a54d2ad1c062b.pdf]

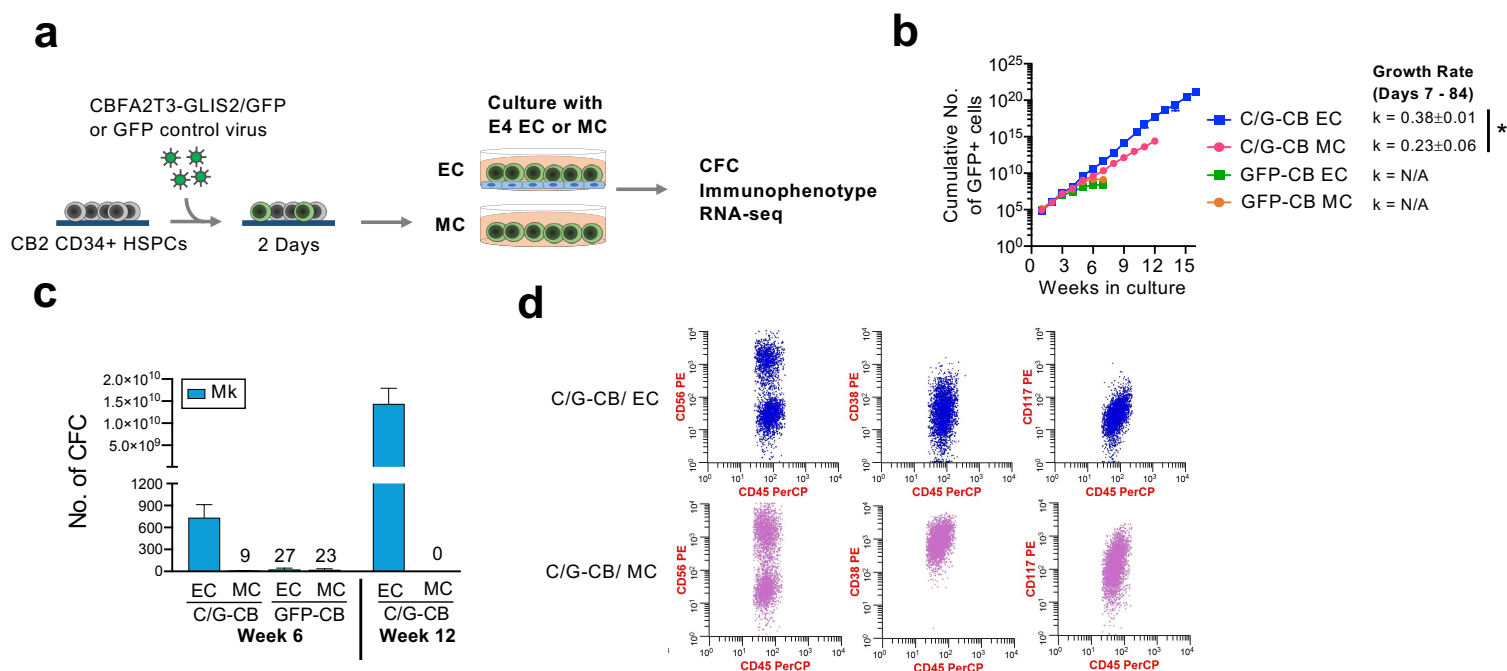

**Extended Data Figure 4. ECs promote transformation of C/G-CB cells.** **a.** Schematic of transduction and long-term cultures of cord blood CD34+ HSPCs from a second donor. **b.** Growth kinetics of transduced cells over days in EC or MC as determined by the cumulative number of GFP+ cells. Mean +/- standard deviation from 3 technical replicates are shown. Growth rate constant  $k$  was determined by regression analysis using the formula  $N(t) = N(0)e^{kt}$  where  $t$  is measured in days. **c.** Following 6 and 12 weeks of culture, a fraction of each culture was transferred to megacult to enumerate Mk colonies. Data are normalized to the CD34+ input cells at the start of the culture and presented as mean +/- standard deviation from 3 technical replicates. **d.** Expression of the RAM immunophenotype in C/G-CB cells after 6 weeks in either EC co-culture or MC.
