# Supplementary material for: CBFA2T3-GLIS2 oncogenic fusion is sufficient for leukemic transformation
Source: Research Square preprint supplement (doi:10.21203/rs.3.rs-757279/v1), 2021-08-12
Supplement: Supplementary file 2 [file 3c4bad6c6708bcd229b66e9a.pdf]

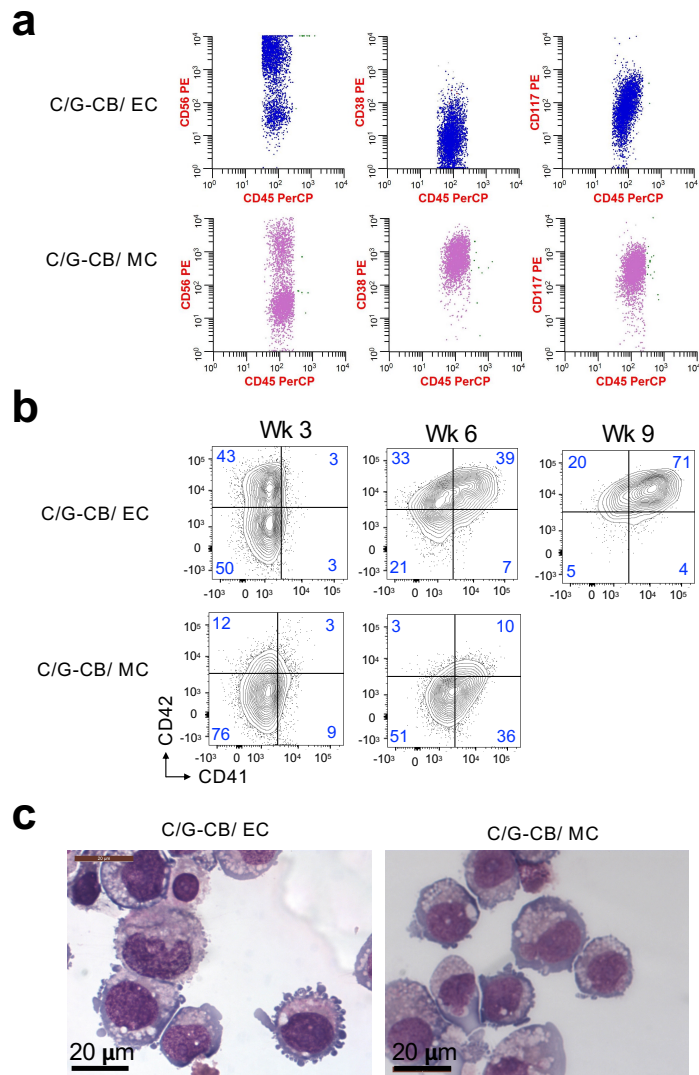

**Extended Data Figure 3. C/G-CB cells cultured with ECs recapitulate the immunophenotype and morphology of C/G fusion positive AML. a.** Expression of the RAM immunophenotype in C/G-CB cells after 6 weeks in EC co-culture or MC. **b.** Quantification of CD41/CD42 subsets at indicated timepoints in EC co-culture or MC. **c.** Morphological evaluation of the C/G-CB cells cultured with ECs or in MC for 9 weeks showed features of megakaryocytic differentiation, including open chromatin, prominent nucleoli, and abundant focally, basophilic and vacuolated cytoplasm with cytoplasmic blebbing.
