# Supplementary material for: CBFA2T3-GLIS2 oncogenic fusion is sufficient for leukemic transformation
Source: Research Square preprint supplement (doi:10.21203/rs.3.rs-757279/v1), 2021-08-12
Supplement: Supplementary file 4 [file 96477275f56d22e456a0e67f.pdf]

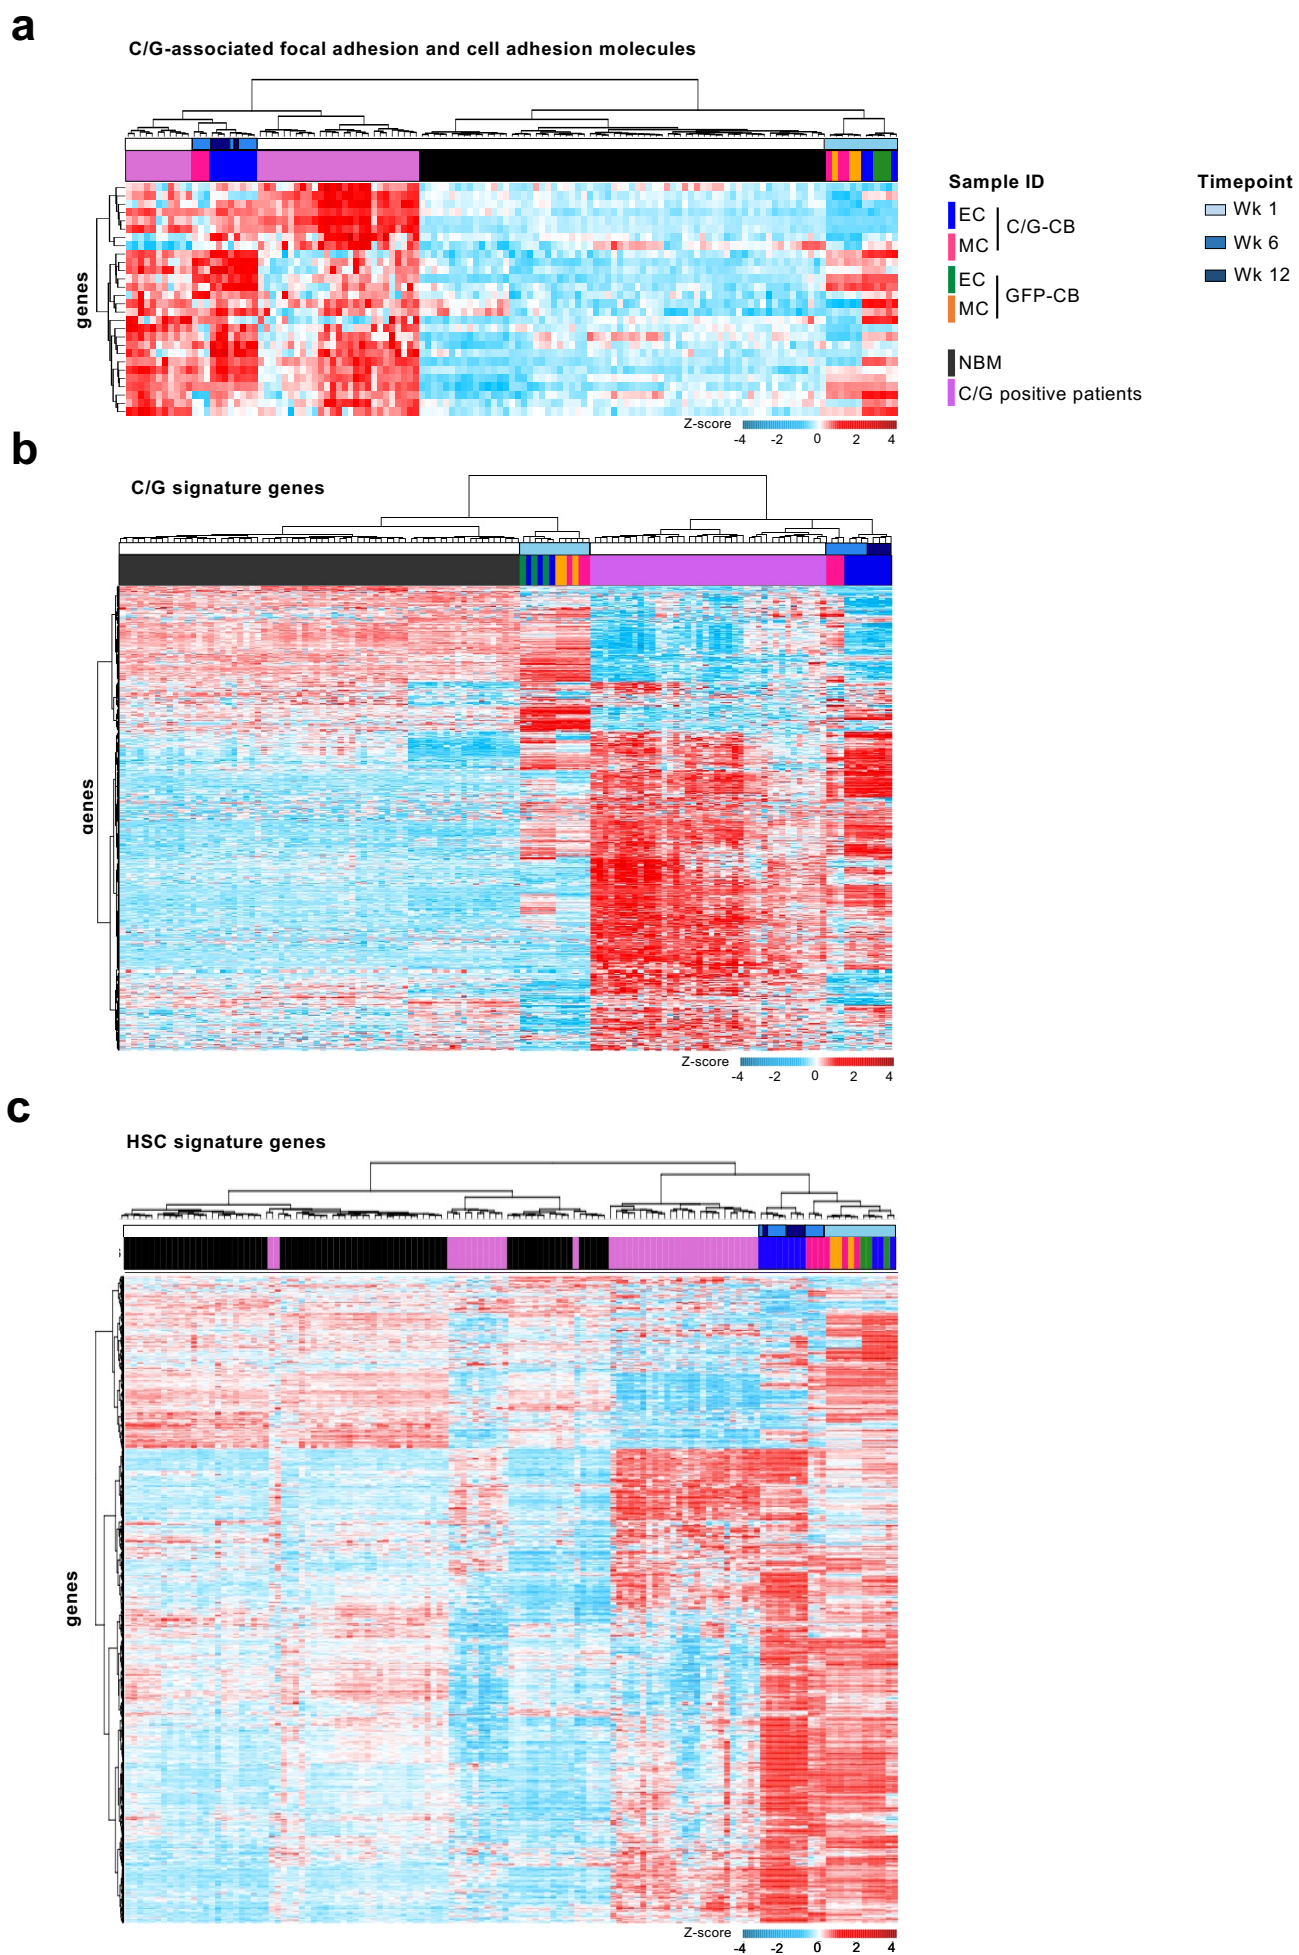

Extended Data Fig. 6

**Extended Data Figure 6. Expression of C/G-specific genes.** Heat maps showing expression of C/G-specific focal adhesion and cell adhesion molecule genes (**a**), genes associated with primary C/G fusion positive AML (**b**), and HSC signature genes (**c**). Unsupervised hierarchical clustering demonstrates clustering of C/G-CB cells cultured with ECs for 6 and 12 weeks with primary C/G samples.
